# Supplementary material for: Anticancer Potential and Safety Profile of β-Lapachone In Vitro
Source: MDPI journal article supplement (doi:10.3390/molecules29061395), 2024-03-21
Supplement: s1 [file s1]

# Supplementary Material

## Characterization of $\beta$ -lapachone

The orange crystals obtained from the acid synthesis of lapachol were subjected to  $^1\text{H}$  NMR analysis, observing characteristic signs of  $\beta$ -lapachone: singlet 1.47 with integral for 6 hydrogens, referring to methyl (3H-1' and 3H- two'). Two triplets in  $\delta$  1.8 and  $\delta$  2.5, with an integral for two hydrogens referring to the methylene hydrogens H-4, and the second triplet is the hydrogens of H-3, which are close to the oxygen of the heterocyclic ring, which makes them become more unprotected. Two double doublets, at  $\delta$  8.0 corresponding to H-9, become more unshielded due to their proximity to the carbonyl, and at  $\delta$  7.8 attributed to H-12 while H-10 and H-11 correspond to both double triplets at  $\delta$  7.5 and  $\delta$  7.6 refer to the aromatic ring (**Figure S1; Table S1**). In relation to the NMR spectrum obtained from Carbon (C), the following signals were obtained:  $\delta$  31.6 (C-4);  $\delta$  162.0 (C-1);  $\delta$  112.7 (C-2);  $\delta$  178.6 (C-6);  $\delta$  130.1 (C-13);  $\delta$  132.6 (C-8);  $\delta$  179.9.0 (C-7);  $\delta$  134.8 (C-9);  $\delta$  132.6 (C-5);  $\delta$  16.1 (C-3);  $\delta$  124.6 (C-12);  $\delta$  26.7 (C-1' and C-2') (**Figure S2; Table S1**).

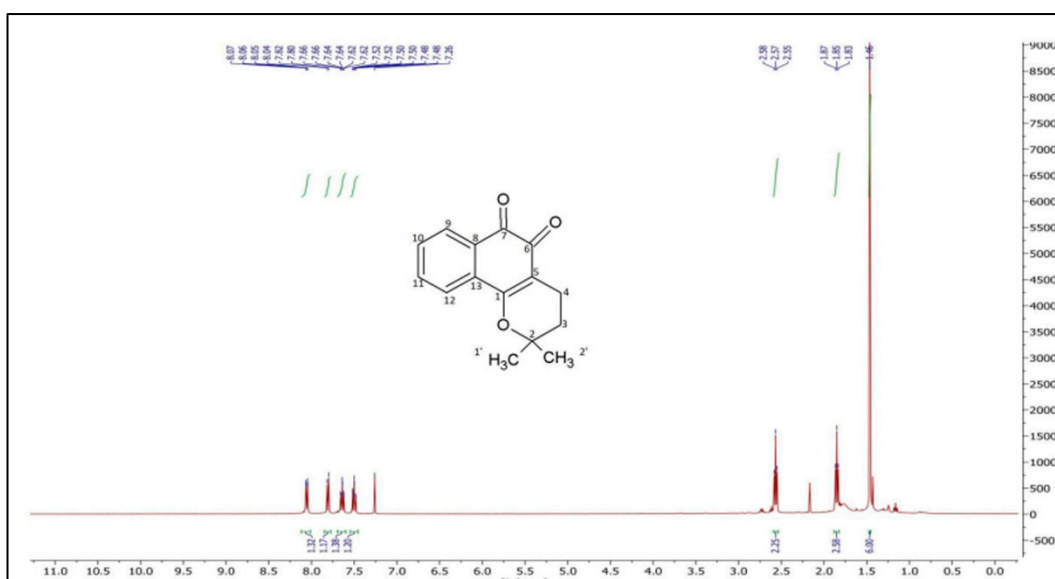

**Figure S1.** Representation of the hydrogen ( $^1\text{H}$ ) nuclear magnetic resonance spectrum of  $\beta$ -lapachone ( $\text{CDCl}_3$ , 200 MHz).

**Table S1.** Data from the attributions of nuclear magnetic resonance signals from  $\beta$ -lapachone ( $^1\text{H}$  200 MHz,  $^{13}\text{C}$  50 MHz,  $\text{CD}_3\text{OD}$ ).

| Position | $\delta$ $^1\text{H}$ (ppm) | $\delta$ $^{13}\text{C}$ (ppm) |
|----------|-----------------------------|--------------------------------|
| 1        | -                           | 162,0                          |
| 2        | -                           | 112,7                          |
| 3        | 1,87 t                      | 16,1                           |
| 4        | 2,58 t                      | 31,6                           |
| 5        | -                           | 132,6                          |
| 6        | -                           | 178,6                          |
| 7        | -                           | 179,9                          |
| 8        | -                           | 132,6                          |
| 9        | 8,-7 dd                     | 134,8                          |
| 10       | 7,62 td                     | 128,6                          |
| 11       | 7,66 td                     | 130,6                          |
| 12       | 7,82 dd                     | 124,6                          |
| 13       | -                           | 130,1                          |
| 1'       | 1,46 s                      | 26,7                           |
| 2'       | 1,46 s                      | 26,7                           |

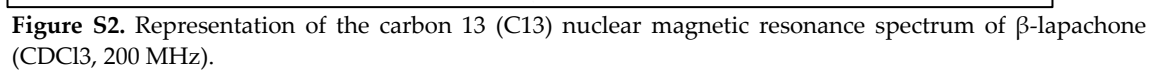

**Figure S2.** Representation of the carbon 13 (C13) nuclear magnetic resonance spectrum of  $\beta$ -lapachone (CDCl<sub>3</sub>, 200 MHz).
